# Supplementary material for: The Natural Unit Expression of Classical Gravitation
Source: Preprints.org preprint supplement (doi:10.20944/preprints202212.0088.v1), 2022-12-06
Supplement: Supplementary file 3 [file supplementary]

## Sheet: GAMMA TBL
					Massive Body	Type	Mass	Mass	Radius	Radius
		CODATA values					M⊙	kg	R⊙	m
		lP	1.61626e-35		Sagittarius A*	Supermassive BH	4154000	8.2601e+36		1.22682e+10		https://arxiv.org/abs/1904.05721
		mP	2.17643e-08		GRO J1655-40	Stellar mass BH	5.31	1.05588e+31		15682.2		https://arxiv.org/abs/1309.3652
		tP	5.39125e-44		4U 1820−30	Neutron Star	1.58	3.14178e+30		9100		https://iopscience.iop.org/article/10.1088/0004-637X/719/2/1807
		c	299792458		Sirius B	White dwarf	1.034	2.05608e+30	0.0084	5.84771e+06		https://iopscience.iop.org/article/10.1086/305489
		G	6.6743e-11		Sun	Star	1	1.98847e+30		696156000		https://www.aanda.org/articles/aa/full_html/2018/08/aa32159-17/aa32159-17.html#:~:text=At%20607.1%20nm%2C%20the%20solar,value%20is%20%C2%B122%20km.
		Neutron mass	1.67493e-27		Earth	Planet		5.9723e+24		6371000
		Solar mass	1.98847e+30
		Solar radius	696156000
	The gravitational constant is equivalent to natural units in its unit dimensions
		Gravitational constant
		m3/ kgs2
		6.6743e-11
	Table 1 A summary of certain classical gravitational formulas in natural units
		Physical property	Symbol	Standard Formula	Natural unit formula
		Schwarzschild Radius
		Escape velocity
		Gravitational energy potential
		Gravitational acceleration
		Gravitational force
		Gravitational binding energy
		hawking radiation
	Gravitational potentials are quantified in relation to the ratio of Planck length to Planck mass, creating an important physical constant
		Radial density limit
		m / kg
		7.42616e-28
	Table 2 Classical gravitational potentials stated in terms of the Schwarzschild radius.
		Physical property	Symbol	Formula	Natural unit formula
		Escape velocity
		Gravitational potential energy
		Gravitational acceleration
		Gravitational force
		Gravitational binding energy
	Table 3 Certain ratios in the table act as coefficients, diluting Planck scale gravitational potentials on a scale of 0 to 1
		Massive Body	Body Type	βr	βM	βr βM	βm
				dimensionless	dimensionless	dimensionless	dimensionless
		Sagittarius A*	Supermassive BH	1.31744e-45	3.79525e+44	0.5	7.69574e-20
		GRO J1655-40	Stellar mass BH	1.03063e-39	4.85141e+38	0.5	7.69574e-20
		4U 1820−30	Neutron Star	1.7761e-39	1.44355e+38	0.256389	7.69574e-20
		Sirius B	White dwarf	2.76391e-42	9.447e+37	0.000261107	7.69574e-20
		Sun	Star	2.32169e-44	9.13637e+37	2.12118e-06	7.69574e-20
		Earth	Planet	2.53689e-42	2.74408e+32	6.96143e-10	7.69574e-20
	Table 4 The proportionality coefficients in Table 3 quantify gravitational potentials in proportion to the Planck scale.								Standard formulas using the gravitational constant
		Massive Body	Schwarzschild radius	Escape velocity	Energy potential	Acceleration	Force		Schwarzschild radius	Escape velocity	Energy potential	Acceleration	Force
			m	m/s	kgm2/s2	m/s2	kgm/s2		m	m/s	kgm2/s2	m/s2	kgm/s2
		Planck scale potential	1.61626e-35	-299792458	-1.95608e+09	-5.56073e+51	1.21026e+44
		Sagittarius A*	1.22682e+10	-299792458	-7.52675e-11	-3.66295e+06	6.13518e-21		1.22682e+10	-2.99792e+08	-7.52675e-11	-3.66295e+06	6.13518e-21
		GRO J1655-40	15682.2	-299792458	-7.52675e-11	-2.86552e+12	4.79954e-15		15682.2	-2.99792e+08	-7.52675e-11	-2.86552e+12	4.79954e-15
		4U 1820−30	4666.28	-2.14677e+08	-3.85955e-11	-2.53221e+12	4.24126e-15		4666.28	-2.14677e+08	-3.85955e-11	-2.53221e+12	4.24126e-15
		Sirius B	3053.75	-6.85085e+06	-3.93057e-14	-4.01304e+06	6.72155e-21		3053.75	-6.85085e+06	-3.93057e-14	-4.01304e+06	6.72155e-21
		Sun	2953.34	-617482	-3.19311e-16	-273.849	4.58678e-25		2953.34	-617482	-3.19311e-16	-273.849	4.58678e-25
		Earth	0.00887025	-11186.3	-1.04794e-19	-9.82047	1.64486e-26		0.00887025	-11186.3	-1.04794e-19	-9.82047	1.64486e-26
